# Supplementary material
Source: publisher site journal article supplement (https://www.dovepress.com/article/484103)
Supplement: Supplementary file 1 [file get_supplementary_file.php]

| Supplementary Table S1 Comparison of different groups at the same time point for ELISA testing | | | | | | | | | | | | |
| --- | --- | --- | --- | --- | --- | --- | --- | --- | --- | --- | --- | --- |
| Time = 6 | [ALL] | Group 1 | Group 2 | Group 3 | Group 4 | p.overall | p. Group 1  vs Group 2 | p. Group 1  vs Group 3 | p. Group 1  vs Group 4 | p. Group 2  vs Group 3 | p. Group 2  vs Group 4 | p. Group 3  vs Group 4 |
| N=24 | N=6 | N=6 | N=6 | N=6 |
| hepcidin | 6.48±1.81 | 3.95±0.45 | 6.12±0.72 | 7.99±0.61 | 7.85±1.05 | <0.001 | <0.001 | <0.001 | <0.001 | 0.001 | 0.003 | 0.987 |
| IL.6 | 81.1±21.3 | 47.8±2.21 | 81.8±4.24 | 101±6.57 | 94.0±4.45 | <0.001 | <0.001 | <0.001 | <0.001 | <0.001 | 0.001 | 0.078 |
| TNF-a | 167±81.9 | 47.0±9.59 | 151±27.5 | 245±23.6 | 225±22.7 | <0.001 | <0.001 | <0.001 | <0.001 | <0.001 | <0.001 | 0.388 |
| serum.iron | 52.6±26.2 | 93.2±2.72 | 46.8±10.9 | 25.4±4.69 | 45.1±6.76 | <0.001 | <0.001 | <0.001 | <0.001 | <0.001 | 0.974 | <0.001 |
| liver.iron | 80.4±21.3 | 53.3±5.40 | 109±5.69 | 76.9±8.88 | 82.1±6.17 | <0.001 | <0.001 | <0.001 | <0.001 | <0.001 | <0.001 | 0.546 |
| Time = 12 | [ALL] | Group 1 | Group 2 | Group 3 | Group 4 | p.overall | p. Group 1  vs Group 2 | p. Group 1  vs Group 3 | p. Group 1  vs Group 4 | p. Group 2  vs Group 3 | p. Group 2  vs Group 4 | p. Group 3  vs Group 4 |
| N=24 | N=6 | N=6 | N=6 | N=6 |
| hepcidin | 7.21±1.96 | 4.59±1.00 | 6.77±0.81 | 9.36±0.88 | 8.11±0.54 | <0.001 | 0.001 | <0.001 | <0.001 | <0.001 | 0.05 | 0.07 |
| IL.6 | 80.0±15.3 | 56.9±5.44 | 79.4±4.12 | 94.1±5.74 | 89.5±3.23 | <0.001 | <0.001 | <0.001 | <0.001 | <0.001 | 0.008 | 0.357 |
| TNF-a | 154±76.0 | 46.8±26.1 | 139±23.8 | 236±28.0 | 194±22.6 | <0.001 | <0.001 | <0.001 | <0.001 | <0.001 | 0.006 | 0.046 |
| serum.iron | 49.6±24.0 | 89.0±5.97 | 42.5±4.72 | 33.2±2.02 | 33.7±6.77 | <0.001 | <0.001 | <0.001 | <0.001 | 0.025 | 0.038 | 0.998 |
| liver.iron | 83.6±18.9 | 56.3±3.69 | 103±9.29 | 83.2±6.91 | 91.6±7.90 | <0.001 | <0.001 | <0.001 | <0.001 | 0.001 | 0.049 | 0.224 |
| Time = 24 | [ALL] | Group 1 | Group 2 | Group 3 | Group 4 | p.overall | p. Group 1  vs Group 2 | p. Group 1  vs Group 3 | p. Group 1  vs Group 4 | p. Group 2  vs Group 3 | p. Group 2  vs Group 4 | p. Group 3  vs Group 4 |
| N=24 | N=6 | N=6 | N=6 | N=6 |
| hepcidin | 7.24±1.76 | 5.51±1.75 | 6.11±0.47 | 8.95±0.57 | 8.39±0.60 | <0.001 | 0.729 | <0.001 | <0.001 | <0.001 | 0.004 | 0.768 |
| IL.6 | 84.3±20.7 | 52.9±5.94 | 84.9±7.36 | 104±5.13 | 95.7±8.60 | <0.001 | <0.001 | <0.001 | <0.001 | 0.001 | 0.06 | 0.221 |
| TNF-a | 150±61.1 | 50.8±21.0 | 168±11.2 | 202±12.3 | 177±8.57 | <0.001 | <0.001 | <0.001 | <0.001 | 0.002 | 0.746 | 0.022 |
| serum.iron | 49.9±23.5 | 87.4±5.64 | 39.0±6.72 | 38.1±11.8 | 35.3±8.55 | <0.001 | <0.001 | <0.001 | <0.001 | 0.998 | 0.872 | 0.938 |
| liver.iron | 77.9±19.2 | 54.2±4.56 | 102±13.9 | 72.5±2.75 | 83.2±7.12 | <0.001 | <0.001 | 0.005 | <0.001 | <0.001 | 0.005 | 0.143 |

| Supplementary Table S2 Comparison of various markers among different groups at the same time for western blotting | | | | | | | | | | | | | |
| --- | --- | --- | --- | --- | --- | --- | --- | --- | --- | --- | --- | --- | --- |
| time | marker | [ALL] | Group 1 | Group 2 | Group 3 | Group 4 | p.overall | p.Group 1 vs Group 2 | p.Group 1 vs Group 3 | p.Group 1 vs Group 4 | p.Group 2 vs Group 3 | p.Group 2 vs Group 4 | p.Group 3 vs Group 4 |
| N=12 | N=3 | N=3 | N=3 | N=3 |
| 6 h | TFR2 | 0.73±0.22 | 0.39±0.01 | 0.71±0.02 | 0.89±0.04 | 0.92±0.02 | <0.001 | <0.001 | <0.001 | <0.001 | <0.001 | <0.001 | 0.284 |
| ZIPP14 | 0.45±0.16 | 0.22±0.02 | 0.38±0.03 | 0.59±0.01 | 0.60±0.02 | <0.001 | <0.001 | <0.001 | <0.001 | <0.001 | <0.001 | 0.764 |
| DMT1 | 0.45±0.21 | 0.28±0.02 | 0.26±0.01 | 0.50±0.02 | 0.76±0.02 | <0.001 | 0.308 | <0.001 | <0.001 | <0.001 | <0.001 | <0.001 |
| SLC40A1 | 0.62±0.27 | 0.94±0.02 | 0.79±0.02 | 0.47±0.01 | 0.27±0.01 | <0.001 | <0.001 | <0.001 | <0.001 | <0.001 | <0.001 | <0.001 |
| 12 h | TFR2 | 0.76±0.25 | 0.43±0.04 | 0.78±0.04 | 1.10±0.03 | 0.75±0.05 | <0.001 | <0.001 | <0.001 | <0.001 | <0.001 | 0.826 | <0.001 |
| ZIP14 | 0.45±0.16 | 0.22±0.02 | 0.41±0.02 | 0.58±0.04 | 0.60±0.02 | <0.001 | <0.001 | <0.001 | <0.001 | <0.001 | <0.001 | 0.706 |
| DM | 0.54±0.19 | 0.29±0.01 | 0.50±0.01 | 0.80±0.02 | 0.55±0.01 | <0.001 | <0.001 | <0.001 | <0.001 | <0.001 | 0.006 | <0.001 |
| SLC40A1 | 0.53±0.27 | 0.93±0.01 | 0.49±0.01 | 0.21±0.01 | 0.50±0.01 | <0.001 | <0.001 | <0.001 | <0.001 | <0.001 | 0.24 | <0.001 |
| 24 h | TFR2 | 0.70±0.20 | 0.38±0.03 | 0.77±0.02 | 0.87±0.03 | 0.77±0.02 | <0.001 | <0.001 | <0.001 | <0.001 | 0.004 | 1 | 0.004 |
| ZIP14 | 0.43±0.15 | 0.23±0.02 | 0.45±0.02 | 0.62±0.02 | 0.44±0.02 | <0.001 | <0.001 | <0.001 | <0.001 | <0.001 | 0.874 | <0.001 |
| DMT1 | 0.61±0.30 | 0.28±0.01 | 0.53±0.01 | 1.07±0.02 | 0.57±0.01 | <0.001 | <0.001 | <0.001 | <0.001 | <0.001 | 0.087 | <0.001 |
| SLC40A1 | 0.61±0.27 | 0.92±0.03 | 0.79±0.03 | 0.48±0.03 | 0.27±0.03 | <0.001 | 0.004 | <0.001 | <0.001 | <0.001 | <0.001 | <0.001 |
